# Supplementary material for: Tissue-specific control of latent CMV reactivation by regulatory T cells
Source: PLOS journal article supplement (doi:10.1371/journal.ppat.1006507), 2017-08-10
Supplement: S3 (10.1371/journal.ppat.1006507.s003) [file journal.ppat.1006507.s003]

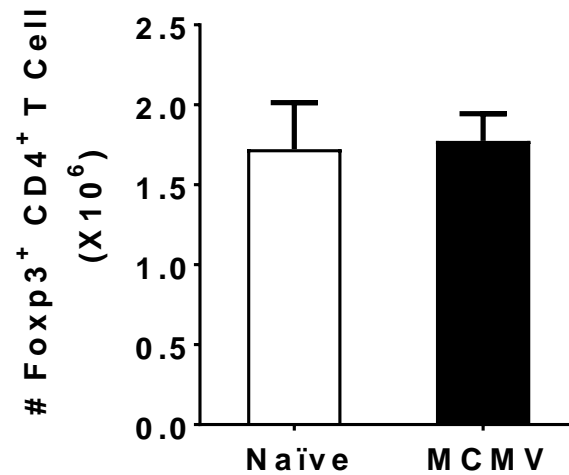

**S1 Fig. Treg in the spleen during latent MCMV.** Splenocytes were isolated from naïve (9.5 months), or aged matched MCMV-latently infected mice (8 months p.i.). Cells were stained for CD4 and Foxp3 and analyzed by flow cytometry. Graph shows the number of Foxp3<sup>+</sup> cells in total CD4<sup>+</sup> cells. Naïve (N=4), WT MCMV infected (N=6).
